# Supplementary material
Source: PubMed Central journal article supplement (PMC8491433)
Supplement: NIHMS1742000-supplement-Supplementary_material.pdf [file NIHMS1742000-supplement-Supplementary_material.pdf]

**Supplemental Text 1: IL-6 in COVID-19 Infection**

The review by Leisman et al (2020) demonstrated IL-6 concentrations in other conditions associated with markedly elevated cytokine levels (i.e., sepsis, CAR-T-associated cytokine release syndrome, and non-COVID-19 ARDS) were anywhere from 12 to 100 times higher than the IL-6 concentrations associated with severe or critical COVID-19 infection. The authors suggest that cytokine storm may not play as pivotal a role in COVID-19-induced end-organ dysfunction as previously thought. However, it is important to consider that these other hyperinflammatory conditions analyzed in the aforementioned have differing pathophysiology and biology compared to COVID-19, and as such a head-to-head comparison of IL-6 levels may not be entirely appropriate in evaluating the role of the cytokine response in COVID-19. In fact, studies have shown that elevated IL-6 levels in COVID-19 are associated with higher SARS-CoV-2 viral load and poorer prognosis, thus supporting the central role of a heightened inflammatory response in COVID-19 (1,2). This observation does not preclude the possibility that other cytokines associated with the release syndrome (e.g., IL-1 $\beta$ , which is more directly regulated by colchicine than IL6)) may be equally or more important than IL-6 in COVID-19 responses.

Since the start of the COVID-19 pandemic, significant resources have been allocated to investigate the therapeutic efficacy of anti-IL-6 therapies with respect to severe COVID-19 infection. Thus far, the results of these studies have been equivocal at best. In a meta-analysis by Lan et al, although patients treated with tocilizumab were found to have lower all-cause mortality compared to the placebo group, the results did not achieve statistical significance, with risk of ICU admission and the need for mechanical ventilation similar between the two groups (3). None of the included studies were randomized controlled trials, however, and in many of them baseline characteristics/illness severity of patients were not matched. Larger-scale randomized trials have shown similar results, with trials of both tocilizumab and sarilumab failing to meet their primary endpoint (4,5). Furthermore, some studies have demonstrated that the immunosuppressive effects of anti-IL-6 therapies may actually contribute to adverse effects in COVID-19 patients due to secondary bacterial or, less commonly, fungal infections (3,6). Despite these overall

disappointing results, ongoing studies continue to investigate anti-IL-6 agents with respect to combination therapies, and alternative dosing regimens that may hold promise for COVID-19 infection.

Although colchicine has been shown to inhibit IL-6 secretion, it has multiple additional mechanisms of action that may potentially temper the COVID-19-induced hyperinflammatory response. Additionally, colchicine is not immunosuppressive compared to its anti-IL-6 counterparts, and thus may be a more suitable COVID-19 treatment. Finally, most studies of colchicine have aimed to dampen inflammation at an early stage, whereas most studies of anti-IL-6 therapeutics have been directed at treating the COVID-19 inflammatory response at a very advanced stage of the infection, when targeting a single cytokine may simply be too little, too late.

#### References

1. Chen X, Zhao B, Qu Y, Chen Y, Xiong J, Feng Y, Men D, Huang Q, Liu Y, Yang B, Ding J, Li F. Detectable serum SARS-COV-2 viral load (RNAemia) is closely correlated with drastically elevated interleukin-6 (IL-6) level in critically ill COVID-19 patients. *Clin Infect Dis* 2020; Epub ahead of print.
2. Han H, Ma Q, Li C, Liu R, Zhao L, Wang W, Zhang P, Liu X, Gao G, Liu F, Jiang Y, Cheng X, Zhu C, Xia Y. Profiling serum cytokines in COVID-19 patients reveals IL-6 and IL-10 as disease severity predictors. *Emerg Microbes Infect* 2020;9(1):1123-1130.
3. Lan SH, Lai CC, Huang HT, Chhang SP, Lu LC, Hsueh PR. Tocilizumab for severe COVID-19: a systematic review and meta-analysis. *Int J Antimicrob Agents* 2020; 56(3):106103.
4. Roche. Roche provides an update on the Phase III COVACTA trial of Actemra/RoActemra in hospitalized patients with severe COVID-19 associated pneumonia. Available at: <https://www.roche.com/investors/updates/inv-update-2020-07029.htm>. Accessed November 2, 2020.
5. Sanofi. Sanofi and Regeneron provide update on Kevzara (sarilumab) Phase 3 U.S. trial in COVID-19 patients. Available at: <https://www.sanofi.com/en/media-room/press-releases/2020/2020-07-02-22-30-00>. Accessed November 2, 2020.
6. Kimmig LM, Wu D, Gold M, et al. IL-6 inhibition in critically ill COVID-19 patients is associated with increased secondary infections. Preprint. medRxiv. 2020;2020.05.15.20103531. Published 2020 Sep 12. doi:[10.1101/2020.05.15.20103531](https://doi.org/10.1101/2020.05.15.20103531)

**Supplemental Table 1. Studies Reporting the Risk of Pneumonia with Colchicine**

| <b>Study</b>                                                    | <b>Design</b>                                           | <b>Result</b>                                                                             |
|-----------------------------------------------------------------|---------------------------------------------------------|-------------------------------------------------------------------------------------------|
| Nidorf et al, NEJM 2020                                         | Prospective double-blind trial, colchicine vs placebo   | No increase in pneumonia in colchicine group                                              |
| Tardif et al, NEJM 2020                                         | Prospective double-blind trial, colchicine vs placebo   | Increased pneumonia in colchicine group                                                   |
| Besisow et al, European Journal of Cardio-Thoracic Surgery 2018 | Prospective randomized study, colchicine vs placebo     | One patient with pneumonitis in colchicine group vs none in placebo group                 |
| Tsai et al, Frontiers in Pharmacology 2019                      | Retrospective cohort study, colchicine vs no colchicine | Higher cumulative incidence of pneumonia in colchicine group; higher with longer exposure |
| Spaetgens et al, Scientific Reports 2017                        | Retrospective cohort study, colchicine vs no colchicine | Increased pneumonia among past but not current colchicine users                           |

## Supplemental Table 2. Published and Ongoing Studies of Colchicine in COVID-19

**eGFR** – estimated glomerular filtration rate, **QTc** – corrected QT interval, **CRP** – c-reactive protein, **LDH** – lactate dehydrogenase, **IL-6** – interleukin-6, **SARS** – severe acute respiratory syndrome, **CK** – creatinine kinase, **CrCL** – creatinine clearance, **TNF-alpha** – tumor necrosis factor-alpha, **GDF-15** – growth differentiation factor-15, **BNP** – B-type natriuretic peptide, **IBD** – inflammatory bowel disease,

\* Patients with hypersensitivity to colchicine, <18, and pregnant were not included in most studies

| Study (Date)                             | Clinical Setting                      | Design (n)                                        | Exclusion Criteria*                                                                                                                                                                                                                               | Intervention                                                           | Primary Outcome(s)                                                                                                           | Secondary Outcome(s)                                                             | Significant Results                                                                                            | Inflammatory Measures                                     | Reference                                                                                                                                                                                                                                                                                                                                                          |
|------------------------------------------|---------------------------------------|---------------------------------------------------|---------------------------------------------------------------------------------------------------------------------------------------------------------------------------------------------------------------------------------------------------|------------------------------------------------------------------------|------------------------------------------------------------------------------------------------------------------------------|----------------------------------------------------------------------------------|----------------------------------------------------------------------------------------------------------------|-----------------------------------------------------------|--------------------------------------------------------------------------------------------------------------------------------------------------------------------------------------------------------------------------------------------------------------------------------------------------------------------------------------------------------------------|
| GRECCO-19 (April 3 to April 27, 2020)    | Early Inpatient                       | Randomized, open-label vs usual care (105)        | Hepatic failure, eGFR <20 mL/min/1.73 m <sup>2</sup> , QTc ≥ 450 ms, early mechanical ventilation                                                                                                                                                 | Colchicine 1.5mg loading dose + 0.5mg after 60 minutes, then 0.5mg BID | 1) maximum high-sensitivity cardiac troponin level, 2) time for CRP to reach >3x ULN, 3) Clinical deterioration by WHO scale | 1) % requiring mechanical ventilation, 2) all-cause mortality, 3) adverse events | Clinical primary end point lower (p=0.02), Maximum D-dimer lower (p=0.04), Higher diarrhea incidence (p=0.003) | CPK, CRP, d-dimer, ferritin, LDH, procalcitonin, troponin | Deftereos SG, Giannopoulos G, Vrachatis DA, et al. Effect of Colchicine vs Standard Care on Cardiac and Inflammatory Biomarkers and Clinical Outcomes in Patients Hospitalized With Coronavirus Disease 2019: The GRECCO-19 Randomized Clinical Trial. <i>JAMA Netw Open</i> . 2020;3(6):e2013136.                                                                 |
| Scarsi et al. (March 5 to April 5, 2020) | Early Inpatient                       | Randomized, open-label vs usual care (262)        | Renal failure                                                                                                                                                                                                                                     | Colchicine 1mg per day (reduced to 0.5mg if severe diarrhea)           | Survival rates                                                                                                               | Clinical and laboratory comparison                                               | Higher survival (84% vs 64%, p<0.001)                                                                          | CRP, Ferritin                                             | Scarsi M, Piantoni S, Colombo E, et al. Association between treatment with colchicine and improved survival in a single-centre cohort of adult hospitalised patients with COVID-19 pneumonia and acute respiratory distress syndrome. <i>Ann Rheum Dis</i> . 2020.                                                                                                 |
| Lopes et al. (April 11 to July 6, 2020)  | Inpatient, moderate to severe disease | Randomized, double-blind, placebo-controlled (38) | Weight ≤ 50 kg, abnormal calcium or potassium levels, QTc ≥ 450 ms, diarrhea causing dehydration, porphyria, myasthenia gravis, uncontrolled arrhythmia, metastatic cancer, immunosuppressive chemotherapy, CYP3A4 inhibitor use, hepatic failure | Colchicine 0.5mg TID for 5 days, then 0.5mg BID for 5 days             | 1) Supplemental oxygen, 2) LOS, 3) ICU admission, 4) ICU LOS, 5) all-cause mortality                                         | 1) CRP, 2) LDH and WBC relation, 3) adverse events, 4) QT interval >450 ms.      | Less need for supplemental oxygen (p=0.01), Shorter LOS (p=0.01), Reduction in CRP (p<0.001)                   | CRP, LDH                                                  | Lopes MIF, Bonjorno LP, Giannini MC, et al. Beneficial effects of colchicine for moderate to severe COVID-19: an interim analysis of a randomized, double-blinded, placebo controlled clinical trial. medRxiv. [Preprint]. Date Accessed: August 25, 2020. <a href="https://doi.org/10.1101/2020.08.06.20169573">https://doi.org/10.1101/2020.08.06.20169573</a> . |

|                                                |                         |                                                                 |                                                                                                                                                                            |                                                                                                        |                                                                                                 |                                                                                                                                                |         |                     |                                                                                                                                                                                                                                                                                                                                                                                                                           |
|------------------------------------------------|-------------------------|-----------------------------------------------------------------|----------------------------------------------------------------------------------------------------------------------------------------------------------------------------|--------------------------------------------------------------------------------------------------------|-------------------------------------------------------------------------------------------------|------------------------------------------------------------------------------------------------------------------------------------------------|---------|---------------------|---------------------------------------------------------------------------------------------------------------------------------------------------------------------------------------------------------------------------------------------------------------------------------------------------------------------------------------------------------------------------------------------------------------------------|
| Dalili et al.<br>(March 20, 2020 to present)   | Early Inpatient         | Randomized, double-blind, placebo-controlled (80, anticipated)  | Hypoxia, hepatic failure, eGFR < 20 mL/min/1.73 m <sup>2</sup>                                                                                                             | Colchicine 1.5mg loading dose, then 0.5mg BID                                                          | 1) CRP change, 2) Clinical deterioration by WHO scale, 3) PCR viral load change, 4) CT severity | LDH change                                                                                                                                     | Ongoing | CRP, LDH            | ClinicalTrials.gov [Internet]. Tehran, Iran: National Library of Medicine (US); 2020 April 24. Identifier NCT04360980. The Effects of Standard Protocol With or Without Colchicine in Covid-19 Infection; 2020 March 20 [cited 2020 August 26]. Available from: <a href="https://clinicaltrials.gov/ct2/show/NCT04360980">https://clinicaltrials.gov/ct2/show/NCT04360980</a> .                                           |
| Mostafaie et al.<br>(April 1, 2020 to present) | Inpatient               | Randomized, double-blind, placebo-controlled (200, anticipated) | Severe kidney dysfunction                                                                                                                                                  | Colchicine plus Phenolic Monoterpene Fractions                                                         | All-cause mortality                                                                             | 1) Change in clinical manigestation, 2) LOS, 3) Lab parameters (CRP, Lymphocytes, LDH, IL-6, ESR)                                              | Ongoing | CRP, ESR, IL-6, LDH | ClinicalTrials.gov [Internet]. Kermanshah, Iran: National Library of Medicine (US); 2020 May 18. Identifier NCT04392141. Colchicine Plus Phenolic Monoterpenes to Treat COVID-19; 2020 April 1 [cited 2020 August 26]. Available from: <a href="https://clinicaltrials.gov/ct2/show/NCT04392141">https://clinicaltrials.gov/ct2/show/NCT04392141</a> .                                                                    |
| COLCOVID<br>(April 17, 2020 to present)        | Early or Late Inpatient | Randomized, open-label vs usual care (2500, anticipated)        | No evidence of SARS                                                                                                                                                        | Colchicine 1.5mg loading dose, then 0.5mg 2 hours later, then 0.5mg BID for 14 days or until discharge | All-cause mortality                                                                             | Composite outcome: mechanical ventilation or death                                                                                             | Ongoing | None                | ClinicalTrials.gov [Internet]. Santa Fe, Argentina: National Library of Medicine (US); 2020 March 31. Identifier NCT04328480. The ECLA PHRI COLCOVID Trial. Effects of Colchicine on Moderate/High-risk Hospitalized COVID-19 Patients. (COLCOVID); 2020 April 17 [cited 2020 August 26]. Available from: <a href="https://clinicaltrials.gov/ct2/show/NCT04328480">https://clinicaltrials.gov/ct2/show/NCT04328480</a> . |
| COLVID-19<br>(April 18, 2020 to present)       | Early Inpatient         | Randomized, open-label vs usual care (308, anticipated)         | Severe diarrhea, CrCL < 30 mL/min, liver damage, CYP3A4 inhibitor use, tocilizumab use, neutrophilia, thrombocytopenia, diverticulitis or bowel perforation, ICU admission | Colchicine 0.5mg TID for 30 days                                                                       | Rate of entering critical stage                                                                 | 1) WBC trend, 2) SOFA change, 3) Lab recovery (CK, ALT, ferritin), Disease remission, 4) Adverse events                                        | Ongoing | CK, ferritin        | ClinicalTrials.gov [Internet]. Milan, Italy: National Library of Medicine (US); 2020 May 5. Identifier NCT04375202. Colchicine in COVID-19: a Pilot Study (COLVID-19); 2020 April 18 [cited 2020 August 26]. Available from: <a href="https://clinicaltrials.gov/ct2/show/NCT04375202">https://clinicaltrials.gov/ct2/show/NCT04375202</a> .                                                                              |
| ColCOVID-19<br>(April 20, 2020 to present)     | Inpatient               | Randomized, open-label vs usual care (310, anticipated)         | Hypoxia, unstable, hepatic failure, antiviral use                                                                                                                          | Colchicine 1mg daily                                                                                   | 1) Clinical improvement by WHO, 2) Discharge                                                    | 1) Death, 2) Clinical change by WHO, 3) Mechanical ventilation, 4) LOS, 5) Time to mortality, 6) Time to PCR negative, 7) Fever remission time | Ongoing | None                | ClinicalTrials.gov [Internet]. Parma, Italy: National Library of Medicine (US); 2020 March 26. Identifier NCT04322565. Colchicine Counteracting Inflammation in COVID-19 Pneumonia (ColCOVID-19); 2020 April 20 [cited 2020 August 26]. Available from: <a href="https://clinicaltrials.gov/ct2/show/NCT04322565">https://clinicaltrials.gov/ct2/show/NCT04322565</a> .                                                   |

|                                                   |                                               |                                                                                                                            |                                                                                                                                                                                                                                               |                                                                                                                                                                                                    |                                                                                                                            |                                                                                                                                                                                                                                                                                                                                                       |                        |                                                                                                  |                                                                                                                                                                                                                                                                                                                                                                                                                                             |
|---------------------------------------------------|-----------------------------------------------|----------------------------------------------------------------------------------------------------------------------------|-----------------------------------------------------------------------------------------------------------------------------------------------------------------------------------------------------------------------------------------------|----------------------------------------------------------------------------------------------------------------------------------------------------------------------------------------------------|----------------------------------------------------------------------------------------------------------------------------|-------------------------------------------------------------------------------------------------------------------------------------------------------------------------------------------------------------------------------------------------------------------------------------------------------------------------------------------------------|------------------------|--------------------------------------------------------------------------------------------------|---------------------------------------------------------------------------------------------------------------------------------------------------------------------------------------------------------------------------------------------------------------------------------------------------------------------------------------------------------------------------------------------------------------------------------------------|
| ACTCOVID19<br>(April 21, 2020 to <i>present</i> ) | Early<br>Outpatient<br>and Early<br>Inpatient | Randomized,<br>open-label<br>colchicine vs<br>IFN-beta vs ASA<br>vs rivaroxaban vs<br>usual care<br>(4000,<br>anticipated) | Advanced kidney<br>disease, advanced liver<br>disease, CYP3A4<br>inhibitor use,<br>therapeutic<br>anticoagulation or<br>antiplatelet use                                                                                                      | Outpatient:<br>Colchicine<br>0.6mg BID for<br>3 days, then<br>0.6mg daily for<br>25 days.<br>Inpatient:<br>1.2mg loading<br>dose, then<br>0.6mg 2 hours<br>later, then<br>0.6mg BID for<br>28 days | Outpatient:<br>Composite<br>hospitalization or<br>death; Inpatient:<br>Composite:<br>mechanical<br>ventilation or<br>death | 1) Clinical<br>deterioration by WHO,<br>2) Composite: MACE                                                                                                                                                                                                                                                                                            | Ongoing                | None                                                                                             | ClinicalTrials.gov [Internet].<br>Ontario, Canada: National Library<br>of Medicine (US); 2020 March 27.<br>Identifier NCT04324463. Anti-<br>Coronavirus Therapies to Prevent<br>Progression of Coronavirus Disease<br>2019 (COVID-19) Trial<br>(ACTCOVID19); 2020 April 21<br>[cited 2020 August 26]. Available<br>from:<br><a href="https://clinicaltrials.gov/ct2/show/NCT04324463">https://clinicaltrials.gov/ct2/show/NCT04324463</a> . |
| COMBATCOVID19<br>(April 26 to June 14, 2020)      | Inpatient                                     | Randomized,<br>open-label vs<br>usual care<br>(70, anticipated)                                                            | Hypoxia using >8L<br>supplemental oxygen,<br>unstable, cirrhosis,<br>liver injury, CrCL < 30<br>mL/min, early<br>mechanical ventilation,<br>CYP3A4 inhibitor use,<br>chemotherapy use                                                         | Colchicine<br>1.2mg loading<br>dose, then<br>0.6mg 2 hours<br>later, then<br>0.6mg BID for<br>14 days or until<br>discharge                                                                        | % requiring<br>supplemental<br>oxygen >8L NC                                                                               | 1) Mechanical<br>ventilation, 2) LOS, 3)<br>Mortality, 4)<br>Maximum CRP, 5)<br>Maximum troponin                                                                                                                                                                                                                                                      | Pending<br>Publication | CRP,<br>troponin                                                                                 | ClinicalTrials.gov [Internet].<br>Brooklyn, New York: National<br>Library of Medicine (US); 2020<br>April 27. Identifier NCT04363437.<br>Colchicine in Moderate-severe<br>Hospitalized Patients Before ARDS<br>to Treat COVID-19<br>(COMBATCOVID19); 2020 April<br>26 [cited 2020 August 26].<br>Available from:<br><a href="https://clinicaltrials.gov/ct2/show/NCT04363437">https://clinicaltrials.gov/ct2/show/NCT04363437</a> .         |
| COL-COVID<br>(April 30, 2020 to <i>present</i> )  | Early<br>Inpatient                            | Randomized,<br>open-label vs<br>usual care<br>(102, anticipated)                                                           | Early mechanical<br>ventilation, IBD,<br>previous<br>neuromuscular disease,<br>< 1 year prognosis due<br>to other disease, eGFR<br><30 mL/min, cirrhosis,<br>liver injury,<br>immunosuppressive or<br>immunomodulatory<br>use within 6 months | Colchicine<br>1mg, then<br>0.5mg 2 hours<br>later, then<br>0.5mg BID for<br>7 das, then<br>0.5mg daily for<br>28 days total                                                                        | 1) Clinical<br>deterioration by<br>WHO, 2) IL-6<br>changes                                                                 | 1) Clinical<br>improvement by WHO<br>scale, 2) SOFA<br>change, 3) NEWS<br>change, 4) Mechanical<br>ventilation time, 5)<br>Supplemental oxygen,<br>6) Lab changes (CRP,<br>TNF, GDF-15, IL-1 $\beta$ ,<br>D-dimer, Leukocytes,<br>Lymphocytes,<br>Platelets, LDH,<br>Ferritin, Troponin,<br>BNP, PCR status), 7)<br>LOS, 8) ICU days, 9)<br>Mortality | Ongoing                | BNP,<br>CRP,<br>d-dimer,<br>GDF-15,<br>IL-1 $\beta$ ,<br>IL-6,<br>LDH,<br>TNF-alpha,<br>troponin | ClinicalTrials.gov [Internet].<br>Murcia, Spain: National Library of<br>Medicine (US); 2020 April 17.<br>Identifier NCT04350320. Trial to<br>Study the Benefit of Colchicine in<br>Patients With COVID-19 (COL-<br>COVID); 2020 April 30 [cited 2020<br>August 26]. Available from:<br><a href="https://clinicaltrials.gov/ct2/show/NCT04350320">https://clinicaltrials.gov/ct2/show/NCT04350320</a> .                                      |

|                                                 |                 |                                                                                                           |                                                                                                                                                      |                                                                                     |                                                                                                                                                                              |                                                                                                                                                                                                      |                     |                               |                                                                                                                                                                                                                                                                                                                                                                                                                                                                              |
|-------------------------------------------------|-----------------|-----------------------------------------------------------------------------------------------------------|------------------------------------------------------------------------------------------------------------------------------------------------------|-------------------------------------------------------------------------------------|------------------------------------------------------------------------------------------------------------------------------------------------------------------------------|------------------------------------------------------------------------------------------------------------------------------------------------------------------------------------------------------|---------------------|-------------------------------|------------------------------------------------------------------------------------------------------------------------------------------------------------------------------------------------------------------------------------------------------------------------------------------------------------------------------------------------------------------------------------------------------------------------------------------------------------------------------|
| COLHEART-19<br>(May 1, 2020 to <i>present</i> ) | Inpatient       | Randomized, open-label vs usual care<br>150 (anticipated)                                                 | No cardiac injury, CYP3A4 inhibitor use, severe hematologic disorder, severe neuromuscular disorder, severe renal impairment with hepatic impairment | Colchicine<br>0.6mg BID for 30 days                                                 | Composite of all-cause mortality, mechanical ventilation, or mechanical circulatory support                                                                                  | 1) Lab changes (Troponin, BNP, CRP, D-dimer), 2) LVEF change, 3) Time to primary endpoint, 4) Number of mechanical ventilation and circulatory support, 5) Rehospitalization, 6) All-cause mortality | Ongoing             | BNP, CRP, d-dimer, troponin   | ClinicalTrials.gov [Internet]. Los Angeles, California: National Library of Medicine (US). 2020 April 21. Identifier NCT04355143. Colchicine to Reduce Cardiac Injury in COVID-19 (COLHEART-19); 2020 May 1 [cited 2020 August 26]. Available from: <a href="https://clinicaltrials.gov/ct2/show/NCT04355143">https://clinicaltrials.gov/ct2/show/NCT04355143</a> .                                                                                                          |
| COLORIT<br>(May 8 to August 23, 2020)           | Unspecified     | Randomized, open-label<br>3:1:1:3<br>(colchicine, ruxolitinib, secukinumab, control)<br>(70, anticipated) | No hypoxia, normal CRP, liver failure, GFR < 20 mL/min, QTc > 450 ms, steroid or immunosuppressive use, active cancer, early mechanical ventilation  | Colchicine<br>0.5mg BID for 3 days, then 0.5mg daily/BID based on weight for 7 days | Change from baseline in CAS COVID 19                                                                                                                                         | 1) Combination time to death or mechanical ventilation, 2) Lab changes (CRP, D-dimer), 3) EQ-5D change, 4) Lung CT exposure area change                                                              | Pending Publication | CRP, d-dimer                  | ClinicalTrials.gov [Internet]. Moscow, Russia: National Library of Medicine (US). 2020 May 27. Identifier NCT04403243. COLchicine Versus Ruxolitinib and Secukinumab In Open Prospective Randomized Trial (COLORIT); 2020 May 8 [cited 2020 August 26]. Available from: <a href="https://clinicaltrials.gov/ct2/show/NCT04403243">https://clinicaltrials.gov/ct2/show/NCT04403243</a> .                                                                                      |
| ColchiVID<br>(May 27, 2020 to <i>present</i> )  | Inpatient       | Randomized, double-blind, placebo-controlled<br>(174, anticipated)                                        | > 70 years old, CrCL < 30 mL/min, liver failure, CYP3A4 inhibitor use                                                                                | Colchicine<br>1.5mg loading dose, then 0.5mg BID for 10 days                        | 1) Number of patients with improvement in body temperature, myalgia, arthralgia, total lymphocyte count, D-dimer, fibrinogen, and ferritin, 2) Progression to severe disease | None                                                                                                                                                                                                 | Ongoing             | d-dimer, ferritin, fibrinogen | ClinicalTrials.gov [Internet]. Mexico City, Mexico: National Library of Medicine (US). 2020 April 29. Identifier NCT04367168. Colchicine Twice Daily During 10 Days as an Option for the Treatment of Symptoms Induced by Inflammation in Patients With Mild and Severe Coronavirus Disease (ColchiVID); 2020 May 27 [cited 2020 August 26]. Available from: <a href="https://clinicaltrials.gov/ct2/show/NCT04367168">https://clinicaltrials.gov/ct2/show/NCT04367168</a> . |
| COLCOVIDBD<br>(July 4, 2020 to <i>present</i> ) | Early Inpatient | Randomized, double-blind, placebo-controlled<br>(300, anticipated)                                        | Hepatic failure, eGFR <30 mL/min, decompensated heart failure, QTc > 450 ms, IBD, chemotherapy use                                                   | Colchicine<br>1.2mg BID for 1 day, then 0.6mg daily for 13 days                     | Time to deterioration by 2 points on 7-grade clinical status scale.                                                                                                          | 1) LOS, 2) Supplemental oxygen, 3) Mechanical ventilation, 4) Mortality                                                                                                                              | Ongoing             | None                          | ClinicalTrials.gov [Internet]. Dhaka, Bangladesh: National Library of Medicine (US). 2020 August 26. Identifier NCT04527562. Colchicine in Moderate Symptomatic COVID-19 Patients: Double Blind, Randomized, Placebo Controlled Trial to Observe the Efficacy (COLCOVIDBD); 2020 July 4 [cited 2020 August 26]. Available from: <a href="https://clinicaltrials.gov/ct2/show/NCT04527562">https://clinicaltrials.gov/ct2/show/NCT04527562</a> .                              |

|                                                |                                      |                                                                                                       |                                                                                                                                                                                  |                                                                                                                                                                |                                                                                                       |                                                            |         |      |                                                                                                                                                                                                                                                                                                                                                                                                                                        |
|------------------------------------------------|--------------------------------------|-------------------------------------------------------------------------------------------------------|----------------------------------------------------------------------------------------------------------------------------------------------------------------------------------|----------------------------------------------------------------------------------------------------------------------------------------------------------------|-------------------------------------------------------------------------------------------------------|------------------------------------------------------------|---------|------|----------------------------------------------------------------------------------------------------------------------------------------------------------------------------------------------------------------------------------------------------------------------------------------------------------------------------------------------------------------------------------------------------------------------------------------|
| Della-Torre et al.<br>(Published May 31, 2020) | Outpatient                           | Non-randomized, open label case series (9)                                                            | None                                                                                                                                                                             | Colchicine 1mg BID for 1 day, then 1mg daily until afebrile for 3 days                                                                                         | One patient hospitalized for 4 days                                                                   | 2 patients with mild diarrhea                              |         | None | Della-Torre E, Della-Torre F, Kusanovic M, et al. Treating COVID-19 with colchicine in community healthcare setting. Clin Immunol. 2020;217:108490.                                                                                                                                                                                                                                                                                    |
| COLCORONA<br>(March 23, 2020 to present)       | Early Outpatient                     | Randomized, double-blind, placebo-controlled (6000, anticipated)                                      | ≤ 40 years old, no high-risk criteria, unstable, IBD, neuromuscular disease, eGFR <30 mL/min, cirrhosis, liver injury, chemotherapy use                                          | Colchicine 0.5mg BID for 3 days, then 0.5mg daily for 27 days                                                                                                  | Composite: Hospitalization or Death                                                                   | 1) All-cause mortality, 2) Hospitalization, 3) Ventilation | Ongoing | None | ClinicalTrials.gov [Internet]. Montreal, Canada (Global sites): National Library of Medicine (US); 2020 March 26. Identifier NCT04322682. Colchicine Coronavirus SARS-CoV2 Trial (COLCORONA) (COVID-19); 2020 March 23 [cited 2020 August 26]. Available from: <a href="https://clinicaltrials.gov/ct2/show/NCT04322682">https://clinicaltrials.gov/ct2/show/NCT04322682</a> .                                                         |
| ACTCOVID19<br>(April 21, 2020 to present)      | Early Outpatient and Early Inpatient | Randomized, open-label colchicine vs IFN-beta vs ASA vs rivaroxaban vs usual care (4000, anticipated) | No high-risk criteria, advanced kidney disease, advanced liver disease, CYP3A4 inhibitor use, therapeutic anticoagulation or antiplatelets                                       | Outpatient: Colchicine 0.6mg BID for 3 days, then 0.6mg daily for 25 days. Inpatient: 1.2mg loading dose, then 0.6mg 2 hours later, then 0.6mg BID for 28 days | Outpatient: Composite hospitalization or death; Inpatient: Composite: mechanical ventilation or death | 1) Clinical deterioration by WHO, 2) Composite: MACE       | Ongoing | None | ClinicalTrials.gov [Internet]. Ontario, Canada: National Library of Medicine (US); 2020 March 27. Identifier NCT04324463. Anti-Coronavirus Therapies to Prevent Progression of Coronavirus Disease 2019 (COVID-19) Trial (ACTCOVID19); 2020 April 21 [cited 2020 August 26]. Available from: <a href="https://clinicaltrials.gov/ct2/show/NCT04324463">https://clinicaltrials.gov/ct2/show/NCT04324463</a> .                           |
| COLCHI-COVID<br>(May 25, 2020 to present)      | Early Outpatient                     | Randomized, open-label vs usual care (1028, anticipated)                                              | ≥ 70 years old, no high-risk criteria, severe gastrointestinal disease, neuromuscular disease, eGFR <30 mL/min, cirrhosis, liver injury, chemotherapy use, CYP3A4 inhibitor use, | Colchicine 0.5mg BID for 3 days, then 0.5mg daily for 18 days                                                                                                  | 1) Mortality, 2) Hospitalization                                                                      | None                                                       | Ongoing | None | ClinicalTrials.gov [Internet]. Cantabria, Spain: National Library of Medicine (US); 2020 June 4. Identifier NCT04416334. PREEMPTIVE THERAPY WITH COLCHICINE IN PATIENTS OLDER THAN 70 YEARS WITH HIGH RISK OF SEVERE PNEUMONIAE DUE TO CORONAVIRUS (COLCHI-COVID); 2020 May 25 [cited 2020 August 26]. Available from: <a href="https://clinicaltrials.gov/ct2/show/NCT04416334">https://clinicaltrials.gov/ct2/show/NCT04416334</a> . |
